# Supplementary material
Source: HighWire-hosted journal article supplement (https://erj.ersjournals.com/content/56/4/2000045)
Supplement: inline-supplementary-material-1 [file inline-supplementary-material-1.pdf]

# Supplementary information for “Identification of potentially undiagnosed patients with nontuberculous mycobacterial lung disease using machine learning applied to primary care data in the UK”

## Database Description

### **IQVIA Medical Research Data (IMRD), formally known as The Health Improvement Network (THIN) Research Database**

IMRD is a large UK primary care database containing EMR information. As of September 2019, IMRD contained non-identified primary care medical records from over 18 million patients, of which approximately 2.9 million are currently active, representing over 4% of the UK population. Data are available from 1990 onwards for many patients, with summarised medical information detailed prior to that. The database holds all prescribed medication, signs, diagnoses, lab tests and additional information such as lifestyle factors, BMI and vaccinations. It is possible to obtain additional information from the healthcare team, patients and their carers.

IMRD have been shown to be generally representative of the UK in terms of age and gender comparisons, and QOF chronic disease prevalence [1, 2]. In addition, a study has been performed which compares IMRD data with practices using a different general practice software system (EMIS), and it was shown to match closely with these data, with the main exception that IMRD data patients are slightly more representative of the most affluent social classes. As this socioeconomic information is available in IMRD data, researchers are able to adjust for it in analyses. Studies using IMRD require review by the Scientific Review Committee (SRC) with no requirement for publication.

Data files in IMRD are arranged in standardised tables. Diagnoses are coded in hierarchical Read codes which are grouped in themed “chapters” and include terms relating to symptoms, diagnoses, procedures, and laboratory tests. Prescription items are coded using Gemscript codes, based on NHS dictionary of medicines and devices and linked to BNF chapters

The list of risk factors was derived from literature sources including British Thoracic Society and American Thoracic Society guidelines alongside input from a clinical expert. The Data Science team in IQVIA responsible for generating the code lists has a process in place for the derivation of relevant and accurate codes for databases utilising Read codes, including IMRD: Broad search terms based on the predictor (comprised of diagnoses and /or tests) were developed by an epidemiologist familiar with the coding structure using medical terms and associated synonyms. These were then confirmed before use by review of a qualified medical practitioner familiar with GP systems used in the UK.

## Drug Regimens for Case Selection

**Table S1: List of included drug regimens to identify NTMLD patients**

|     |                |                      |
|-----|----------------|----------------------|
| 1.  | Rifampicin     | Isoniazid/Ethambutol |
| 2.  | Rifabutin      | Isoniazid/Ethambutol |
| 3.  | Isoniazid      | Amikacin             |
| 4.  | Isoniazid      | Streptomycin         |
| 5.  | Isoniazid      | Azithromycin         |
| 6.  | Isoniazid      | Clarithromycin       |
| 7.  | Isoniazid      | Ethambutol           |
| 8.  | Isoniazid      | Linezolid            |
| 9.  | Isoniazid      | Moxifloxacin         |
| 10. | Isoniazid      | Rifabutin            |
| 11. | Isoniazid      | Rifampicin           |
| 12. | Isoniazid      | Cotrimoxazole        |
| 13. | Ethambutol     | Amikacin             |
| 14. | Ethambutol     | Streptomycin         |
| 15. | Ethambutol     | Azithromycin         |
| 16. | Ethambutol     | Clarithromycin       |
| 17. | Ethambutol     | Linezolid            |
| 18. | Ethambutol     | Moxifloxacin         |
| 19. | Ethambutol     | Rifabutin            |
| 20. | Ethambutol     | Rifampicin           |
| 21. | Ethambutol     | Rifampicin/Isoniazid |
| 22. | Ethambutol     | Cotrimoxazole        |
| 23. | Amikacin       | Azithromycin         |
| 24. | Amikacin       | Clarithromycin       |
| 25. | Amikacin       | Clofazimine          |
| 26. | Streptomycin   | Azithromycin         |
| 27. | Streptomycin   | Clarithromycin       |
| 28. | Streptomycin   | Clofazimine          |
| 29. | Tigecycline    | Clarithromycin       |
| 30. | Rifabutin      | Clarithromycin       |
| 31. | Clofazimine    | Azithromycin         |
| 32. | Clofazimine    | Clarithromycin       |
| 33. | Azithromycin   | Moxifloxacin         |
| 34. | Azithromycin   | Ciprofloxacin        |
| 35. | Clarithromycin | Moxifloxacin         |
| 36. | Ethambutol     | Ciprofloxacin        |
| 37. | Clarithromycin | Prothionamide        |
| 38. | Rifampicin     | Clarithromycin       |
| 39. | Azithromycin   | Rifampicin           |
| 40. | Clarithromycin | Ciprofloxacin        |

Note: Patients on any of the above combination regimens (including those also on additional antibiotics) were included.

## Selection of Predictors

The list of risk factors was derived from literature sources including British Thoracic Society and American Thoracic Society alongside input from clinical key opinion leader. The Data Science team in IQVIA responsible for generating the code lists has a process in place for the derivation of relevant and accurate codes for databases utilising Read codes, including IMRD: Broad search terms based on the predictor (comprised of diagnoses and /or tests) were developed by an epidemiologist familiar with the coding structure using medical terms and associated synonyms. These were then confirmed before use by review of a qualified medic familiar with GP systems used in the UK.

**Table S2: List of predictors included in the model**

|                                               |
|-----------------------------------------------|
| <b>Predictors</b>                             |
| Age at index                                  |
| Alcohol use: hazardous (Moderate alcohol use) |
| Alcohol use: harmful (Excessive alcohol use)  |
| Arrhythmia                                    |
| Arteries                                      |
| Aspergillosis                                 |
| Asthma                                        |
| Autoimmune disorders                          |
| Biopsy (lung-related only)                    |
| Body mass index                               |
| Bronchiectasis                                |
| Bronchoscopy/Endoscopy/Tracheostomy           |
| Cerebrovascular Disease                       |
| Chemical fumes exposure                       |
| Chest adenopathy                              |
| Chest pain                                    |

|                                                                                          |
|------------------------------------------------------------------------------------------|
| Congenital respiratory malformations                                                     |
| COPD                                                                                     |
| Cough                                                                                    |
| Crackles/rales                                                                           |
| Crohn's / Ulcerative colitis / Irritable bowel disease                                   |
| Cystic fibrosis                                                                          |
| Dementia                                                                                 |
| Depression                                                                               |
| Diabetes                                                                                 |
| Dyspnea                                                                                  |
| Emphysema                                                                                |
| Family number (members of the same postcode or address are given the same family number) |
| Fatigue                                                                                  |
| Fever                                                                                    |
| Gastroesophageal reflux disease                                                          |
| Heart failure                                                                            |
| Heart valve disorder                                                                     |
| Haemoptysis                                                                              |
| HIV                                                                                      |
| Hyperlipidemia                                                                           |
| Idiopathic pulmonary fibrosis                                                            |
| Imaging (X-ray / CAT scan / Fluoroscopy / MRI)                                           |
| Immune deficiency                                                                        |
| Immunosuppressants prescription                                                          |
| Inhaled corticosteroids prescription                                                     |
| Ischemic heart disease                                                                   |
| Liver cirrhosis                                                                          |
| Lung cancer                                                                              |
| Lung function test                                                                       |
| Macrolides prescription                                                                  |

|                                         |
|-----------------------------------------|
| Malignancy                              |
| Mediastinum test                        |
| Metastatic carcinoma                    |
| MRC Dyspnoea scale 1                    |
| MRC Dyspnoea scale 2                    |
| MRC Dyspnoea scale 3                    |
| MRC Dyspnoea scale 4                    |
| MRC Dyspnoea scale 5                    |
| Multiple Sclerosis                      |
| Obesity                                 |
| Organ Transplant                        |
| Pulmonary alveolar proteinosis          |
| Primary ciliary dyskinesia              |
| Pectus Excavatum                        |
| Penicillin prescription                 |
| Pneumoconiosis                          |
| Pneumocystis pneumonia                  |
| Pneumonia                               |
| Pneumonitis                             |
| Psoriasis                               |
| Psychosis                               |
| Pulmonary alveolar proteinosis          |
| Respiratory failure                     |
| Respiratory syncytial virus             |
| Rheumatic disease                       |
| Scoliosis                               |
| Sex                                     |
| Sjogren's syndrome                      |
| Smoking status at index: Current smoker |
| Smoking status at index: Ex-smoker      |

|                                       |
|---------------------------------------|
| Smoking status at index: Never smoker |
| Smoking status at index: unknown      |
| Stem cell transplant                  |
| Systemic corticosteroids prescription |
| Systemic lupus erythematosus          |
| TNF inhibitors prescription           |
| Weight loss                           |

Comorbidities and medication use were included in the model using metrics describing their frequency (count divided by length of history) and their timing (days since first and last exposure).

## Supplemental Figures

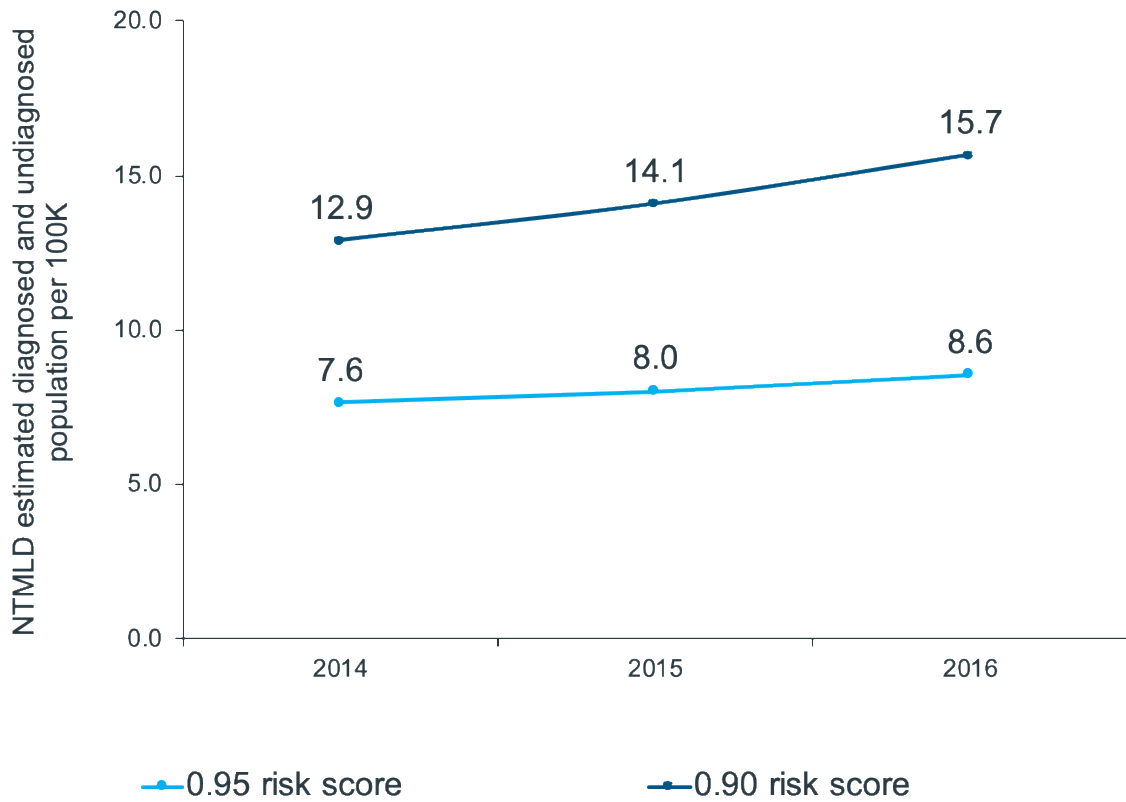

**Figure S 1 Annual estimates for total prevalence of NTMLD cases including both diagnosed and undiagnosed cases**



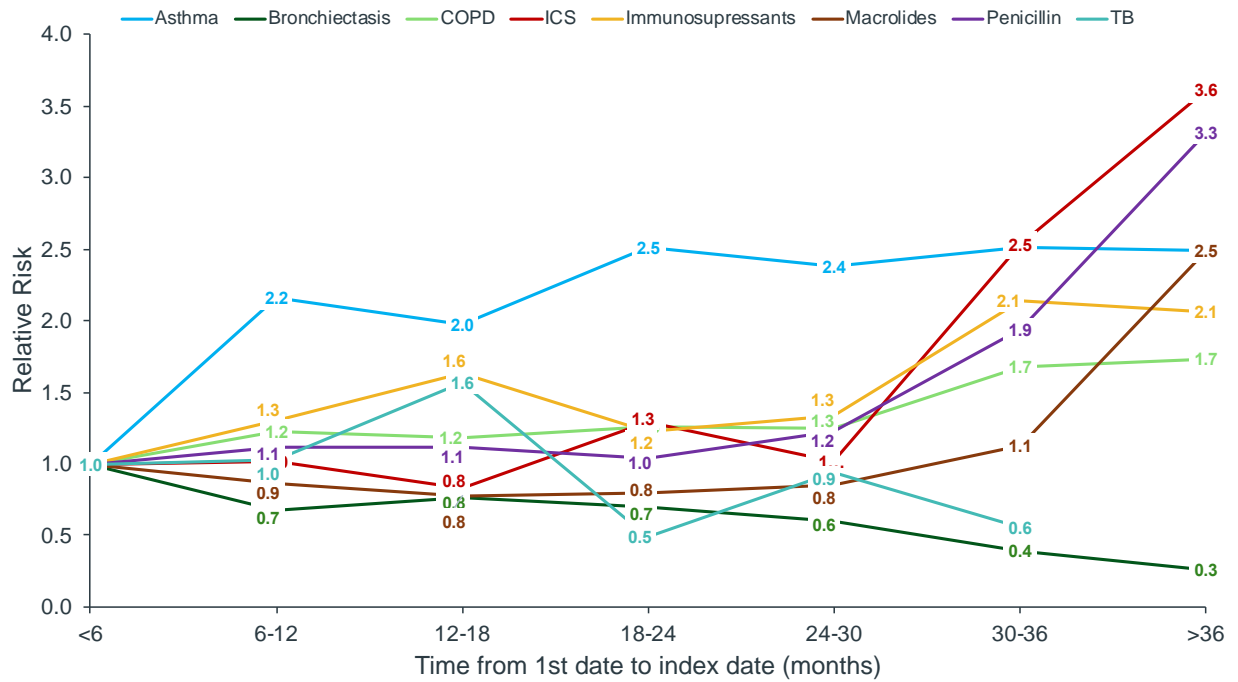

**Figure S 2 Relative risk ratios of NTMLD by time between first occurrence and index date. COPD: Chronic obstructive pulmonary diseases; ICS: Inhaled corticosteroids; Immunosuppressive drugs (including, but not limited to systemic and inhaled corticosteroids, TNF-alfa inhibitors, calcineurin inhibitors, interleukin inhibitors).**

1. Denburg, M.R., et al., *Validation of The Health Improvement Network (THIN) database for epidemiologic studies of chronic kidney disease*. *Pharmacoepidemiol Drug Saf*, 2011. **20**(11): p. 1138-49.
2. Lewis, J.D., et al., *Validation studies of the health improvement network (THIN) database for pharmacoepidemiology research*. *Pharmacoepidemiol Drug Saf*, 2007. **16**(4): p. 393-401.
